1 **Title: Understanding the impact of antenatal care policies in Georgia (USA) and Scotland**  
2 **(UK): A textual synthesis**

3

4 **Authors:** Shim J. <sup>1,2</sup>, Burnett V. <sup>1</sup>, Vernon M. <sup>3</sup>, Work F. <sup>2,4</sup>, Uwaifo I. <sup>3</sup>, Ray C. <sup>3</sup>, Reddi P. <sup>3</sup>

5 **Affiliations:**

6 <sup>1</sup> School of Health Sciences, Robert Gordon University, Aberdeen, UK

7 <sup>2</sup> Scottish Centre for Evidence-based Multi-professional Practice: a JBI Centre of Excellence,  
8 Scotland

9 <sup>3</sup> Medical College of Georgia, Augusta University, Georgia, USA

10 <sup>4</sup> School of Nursing, Midwifery and Paramedic Practice, Robert Gordon University, Aberdeen,  
11 UK

12

13

14

15

16 **Corresponding Author:**

17 Dr Joanna Shim

18 School of Health Sciences

19 Robert Gordon University

20 AB10 7QE, Aberdeen, UK

21 [j.shim1@rgu.ac.uk](mailto:j.shim1@rgu.ac.uk)

22 **Abstract**

23 Objectives: This study aims to (1) understand the role of policy in maternal health outcomes,  
24 and (2) establish any differences or similarities between health systems, providing  
25 benchmarks for future maternal and infant care policies in Georgia and Scotland.

26 Methods: Guided by JBI methodology, a textual review of policies and public health  
27 interventions that have influenced the antenatal care process in both health systems was  
28 conducted. Inclusion criteria for this review were classified using the “PCC” mnemonic:  
29 Population- Pregnant women and mothers; Concept- Policies and strategies that supports  
30 prenatal and maternal health; and Context- Relevant to Scotland and Georgia. Published  
31 primary and secondary research, and grey literature (guidelines, reports, and legislation from  
32 authoritative sources) were included.

33 Results: Overall, 60 sources contributed to the report on maternal health system topics.  
34 Findings of the textual synthesis presented a regionalized system of maternity care led by  
35 physician-provided care models in Georgia compared to the nationalized health system in  
36 Scotland with an extended scope for midwife-led care models. On a secondary, organizational  
37 level, Scotland also widely operates on protocolized, standardized care informed by clinical  
38 guidelines such as NICE. The Georgia health systems also follow national guidelines for care,  
39 but extent of standardization may vary based on a mixed system of private and public  
40 insurance coverage.

41 Discussion/Conclusion: This is the first study to comprehensively examine maternal health  
42 policies in the distinct contexts of Georgia and Scotland, shedding light on the diverse  
43 approaches within their respective healthcare systems. These observed variations stem from  
44 historical, cultural, and policy contexts unique to each region. As the United States continue  
45 to prioritize maternal and child health through public health initiatives, our findings feature  
46 crucial considerations for maternal antenatal care policies. Specifically, there is a discernible  
47 need to increase access to antenatal care and invest in the maternity care provider workforce,  
48 revealing opportunities for targeted improvements in support of maternal health.

49

50

## 51 Introduction

52 Maternal and infant health disparities are a pressing global concern, with the United States  
53 (US) experiencing the highest maternal and infant mortality rates among high-income  
54 nations.<sup>1,2</sup> This rising trend in mortality rates has brought maternal and infant health to the  
55 forefront of many recent public health and research initiatives within the US.<sup>3</sup>

56 Georgia has the second highest maternal mortality rate and the twelfth highest infant  
57 mortality rate in the US.<sup>4,5</sup> Similar to the rest of the US, research has indicated Black mothers  
58 in Georgia are more likely to die from pregnancy, especially in rural areas.<sup>4</sup> Understanding the  
59 factors affecting maternal and infant health in these underserved regions is crucial in  
60 addressing healthcare disparities in the US.<sup>6</sup>

61 In comparison, while Georgia had a maternal mortality rate of 50.8 maternal deaths per  
62 100,000 births in 2019, Scotland (UK) reported a lower rate of 10.9 maternal deaths per  
63 100,000 births between 2017-2019.<sup>7,8</sup> In 2021, 1,205 women died of maternal causes in the  
64 US compared to 861 women in 2020 and 754 women in 2019.<sup>3</sup> Both rural regions in Scotland  
65 and Georgia face similar healthcare challenges, including a need for physicians and limited  
66 access to care.<sup>9</sup> This shared context offers an important point of comparison between the  
67 healthcare systems that operate within these regions. Despite both countries being high-  
68 income nations with high rankings on the Human Development Index (HDI),<sup>10</sup> they offer  
69 distinct healthcare systems and policies for comparison.

70 The US, with its decentralized and predominantly privatized healthcare system, faces unique  
71 challenges in ensuring equitable access to maternal care across diverse regions.<sup>11</sup> In contrast,  
72 Scotland's publicly funded and centralized healthcare system strives to provide  
73 comprehensive healthcare coverage, albeit with its own set of challenges.<sup>12</sup> Understanding  
74 these variations in healthcare systems, their infrastructure, and policies in the context of  
75 maternal and infant health, may elucidate the factors contributing to disparities in preterm  
76 birth rates and inform discussions on maternal care quality and policy reforms in these  
77 regions. This understanding is not only valuable for the nations involved but also contributes  
78 to global efforts to reduce persistent inequalities in health, attainment, and life expectancies,  
79 especially in marginalized communities.<sup>13,14</sup>

80 Therefore, our study aims to (1) understand the role of policy in maternal health outcomes,  
81 and (2) establish any differences or similarities between health systems, providing  
82 benchmarks for future maternal and infant care policies in Georgia and Scotland.

## 83 **Methods**

### 84 **Study Design**

85 A comparative approach was conducted through a textual synthesis of published literature  
86 on the health systems and policies influencing maternal health in Georgia and Scotland. We  
87 recognized that health systems are complex and multifaceted, influenced by a multitude of  
88 variables including government policies, law, national infrastructure, socioeconomic  
89 conditions, cultural norms, and the interactions of various stakeholders – patients, providers,  
90 payors, and policymakers.<sup>15</sup> Therefore, the intention of the textual review was to provide a  
91 nuanced understanding of the policy landscapes of each region to encourage any cross-  
92 regional learning.

### 93 **Textual Review of Maternal Health Literature**

94 The textual review was conducted in accordance with JBI methodology.<sup>16</sup>

### 95 ***Inclusion criteria***

96 Inclusion criteria for this review were classified using the “PICo” (Population, Phenomenon of  
97 interest, Context) mnemonic: Population: Pregnant and birthing women; Phenomenon of  
98 Interest: Policy strategies to reduce maternal morbidity and mortality; and Context: Health  
99 setting in the UK and the US.<sup>16</sup>

### 100 ***Type of sources***

101 Expert opinions, consensus, current discourse, comments, assumptions, or assertions that  
102 appear in various formats including journals, magazines, newspapers, blogs, internet sites,  
103 monographs and reports were largely drawn for this analysis. We reviewed grey literature  
104 that contains policy- and research-relevant information (e.g., clinical practice guidelines,  
105 national reports, program evaluation studies, and legislation) from authoritative sources that  
106 are widely accessible.<sup>17</sup>

107 ***Search strategy***

108 The search comprised of three steps; Firstly, a limited search of MEDLINE and CINAHL using  
109 initial keywords was conducted to develop a full search strategy. Secondly, the full search  
110 strategy was adapted to each database and applied systematically to: MEDLINE, CINAHL,  
111 AMED, EMBase, and Cochrane Library (see Appendix 1). Finally, the third step  
112 involved conducting a search of grey and unpublished literature in the Maternity and Infant  
113 Care database, Open Grey, MedNar, The New York Academy Grey Literature Report, Ethos,  
114 CORE, and Google Scholar using modified search terms for maternal health-related  
115 policies. We also searched the US Congress online legislative database and Georgia online  
116 legislative database for national and Georgia state-level proposed legislation and legislation  
117 passed between 2000 and 2020 addressing maternal health. No limit was placed on language,  
118 but all of the research studies published were in English.

119 ***Study selection***

120 Following the search, all identified sources were collated and uploaded into EndNote and  
121 duplicates were removed. Sources were then imported to Covidence (Melbourne, Australia)  
122 for two-level screening. Firstly, titles and abstracts were screened independently by two  
123 reviewers (PR and VB) with conflicts identified by the management software and resolved by  
124 a third reviewer (JS and FW). Secondly, full-text copies of all sources included at the title and  
125 abstract screening stage were screened using the same processes.

126 ***Quality assessment***

127 Due to the nature of grey literature, which was largely descriptive and based on expert  
128 opinions, it was not appropriate to critically appraise the evidence for this textual synthesis.

129 ***Data extraction and synthesis***

130 A data extraction tool was developed for this review to extract relevant information about  
131 the study and key findings. Data that were extracted were synthesized with the use of  
132 tabulation and graphs and presented alongside an accompanying narrative. The synthesis was  
133 focused on data relating to similarities and differences between the countries.

## 134 Results

### 135 Findings from the textual synthesis

136 The initial search identified 846 articles in the databases, supplemented by a further 253  
137 studies from the grey literature (websites and expert sources). 60 reports were included  
138 following full-text screening. Figure 1 presents the study selection process and the main  
139 reasons for exclusion.

140 A wide variety of different journals and policies contributed to the report on maternal health  
141 system topics, including the *Journal of Policy Analysis and Management*, *Maternal and Child*  
142 *Health Journal*, and the *World Health Organization*. Of the 60 included reports, 42 were  
143 related to Scottish policies while 18 were specific to Georgia. The majority of the studies were  
144 widely accessible public reports with a descriptive component to their design. 27  
145 observational and experimental studies examined the contents of policy or its impact, and 7  
146 were reviews of the literature. Table 1 presents a summary of the characteristics of the  
147 included studies.

148 We carried out a textual synthesis of the data with the intention to review literature that  
149 relates synoptically to maternal health service; highlighting similarities and differences  
150 between the two countries. The literature outlined the public health systems at three main  
151 levels: (1) primary level – action taken at national or country level; (2) secondary level – action  
152 taken at policy or legislative level; and (3) tertiary levels – action was taken at regional or a  
153 specific city or locality-based e.g., programs.

#### 154 *Primary level – national or country level*

155 Maternal care in Scotland is currently provided through the National Health Service Scotland  
156 (NHS Scotland).<sup>12</sup> Scotland is divided into 14 NHS regional Health Boards, each responsible for  
157 planning and delivering healthcare services within a specific geographical area.<sup>18</sup> Specialized  
158 maternity services may sometimes be provided at a national or regional level instead of  
159 individual Health Boards. Generally, maternal care in the UK includes routine antenatal and  
160 postnatal care, midwifery-led care for low-risk pregnancies, and consultant care (obstetrics  
161 or specialists care) for higher-risk pregnancies or medical complications.<sup>19</sup> Scottish  
162 professionals in maternity and neonatal care adhere to established clinical and professional

163 protocols that outline the standards for safe and efficient services, developed by  
164 organizations like the British Association of Perinatal Medicine (BAPM), National Institute for  
165 Clinical Excellence (NICE), and the Scottish Intercollegiate Guidelines Network (SIGN). These  
166 guidelines are often protocolized and embedded into practice to support equitable care.

167 Similarly, the US also strongly adopts evidence-based guidelines and recommendations from  
168 the American College of Obstetricians and Gynecologists (ACOG) and Society for Maternal-  
169 Fetal Medicine (SMFM) to guide their delivery of maternal and infant care. However,  
170 implementation and protocolization of guidelines varies in the US due to its healthcare  
171 system, which involves a mix of public and private healthcare providers, insurance systems,  
172 and government subsidies.<sup>20</sup> Healthcare in the US is the responsibility of individual states, and  
173 while there are national policies and legislations, it should be noted that there can be  
174 significant variations in healthcare planning and policy at the state level. Other healthcare  
175 coverage provided by the government includes Medicaid and Medicare which serves different  
176 populations. Medicaid serves those whose income and/or resources fall below a designated  
177 level while Medicare provides coverage for the elderly.

178 One of the most heavily cited legislation supporting the expansion of healthcare is the Patient  
179 Protection and Affordable Care Act (ACA) that was enacted in 2010. The primary goal of the  
180 ACA was to expand access to health and improving the quality and affordability of  
181 healthcare.<sup>21</sup> The historical healthcare reform law mandates that every individual have health  
182 insurance starting in 2014. The expansion of Medicaid eligibility under the law has successfully  
183 slowed the rise in maternal mortality rates among Black pregnant and birthing individuals in  
184 states where it has been implemented. Additionally, the Affordable Care Act (ACA) required  
185 the coverage of preventive services, such as contraception, and prohibited discrimination  
186 based on pre-existing conditions, including pregnancy. Despite these efforts to expand on  
187 health coverage, 26 million people or 8% of the population remains uninsured and rely on  
188 safety net programs and charity care.<sup>23</sup>

189 Furthermore, coverage of pregnancy-related healthcare varies in the state of Georgia by stage  
190 of pregnancy.<sup>24</sup> Medicaid offers access to physicians' visits, prescription medicines, and in-  
191 and out-patient hospital services for pregnant women with an income of up to 220% above  
192 the poverty line. Labor and delivery costs are also covered through Medicaid, and coverage  
193 lasts up to six months after giving birth. Between 2012-2014, Medicaid was utilized by 12.6%

194 of mothers a month prior to pregnancy while 36.9% of Georgian mothers were uninsured  
195 during this time period.<sup>25</sup>

196 Maternal care models in Scotland and Georgia also vary, with Scotland favoring a midwife-led  
197 approach and Georgia predominantly relying on physician-led care.<sup>19,26</sup> The Best Start report  
198 outlined Scotland's approach to maternity and neonatal care, emphasizing midwife-led  
199 models following national guidelines that encourage women without significant health issues  
200 to utilize community-based midwife-led care services.<sup>12</sup> The comparison between midwife-  
201 led maternal care in Scotland and physician-led maternal services in Georgia, underscores  
202 some of the differences in healthcare models, midwifery roles, and the policies that support  
203 the extended scope of practice, in the UK and the US. These variations have been shaped by  
204 the historical, cultural, and policy contexts of each region.

#### 205 *Secondary level – policy or legislative level*

206 A proportionate number of the included literature were policy and legislative-driven. A  
207 summary of the policy and empirical evidence from the textual synthesis can be found in  
208 Appendix 2. These policies and relevant frameworks were mapped in chronological order on  
209 a timeline for both states as illustrated in Figure 2 and 3.

#### 210 *Scotland*

211 Several key policy frameworks have played a significant role in shaping the strategic landscape  
212 for providing maternity and neonatal services in Scotland. The National Framework for  
213 Maternity Services in Scotland<sup>27</sup> was derived to provide a structured approach to the planning  
214 and delivery of high-standard maternity services. Despite the policy's intentions, historically,  
215 there have been translational challenges in practice due to the lack of a clear implementation  
216 structure. Expert Group on Acute Maternity Services (EGAMS) was established and published  
217 a reference report in 2002 recommending the centralization of maternity services in Scotland  
218 and the establishment of interdisciplinary teams to enhance safety and quality of maternity  
219 care.<sup>27</sup> EGAMS also recognized the importance of improving maternity services in rural areas  
220 due to the challenges they face, playing a significant role in shaping the direction of maternity  
221 care in Scotland. Although the general framework and guidelines for providing maternity care  
222 are set at a national level, there is no specific approach or model to service delivery, allowing  
223 individual NHS Boards to tailor their services to suit the needs of their locality.



224 The Refreshed Framework for Maternity Care in Scotland<sup>28</sup> was further developed to improve  
225 maternal and infant health and diminish disparities in health outcomes. It also established  
226 guiding principles and service benchmarks for maternity care throughout Scotland. The  
227 Quality Framework for Neonatal Care in Scotland<sup>29</sup> provided guidance on providing high  
228 quality, evidence-based, safe, effective and person-focused neonatal care.

229 Continuity of care had been a pivotal policy affecting maternity care in England since 1993  
230 with the publication of Changing Childbirth and an emphasis on Choice, Continuity and  
231 Control, person-centered care in the National Service Framework Maternity Standard and  
232 Maternity Matters.<sup>30,31</sup> Therefore, in 2017, Scotland introduced the 'Best Start' policy, which  
233 identified the future vision of real continuity of care throughout the entire maternity process,  
234 with a particular emphasis on supporting vulnerable families as a fundamental aspect in  
235 advancing maternity services across Scotland within a five-year timeframe. This current policy  
236 emphasizes the provision of consistent care from a dedicated healthcare professional or a  
237 team throughout pregnancy, childbirth, and the postnatal period. It promotes person-  
238 centered, personalized care and fosters trust between patients and healthcare providers,  
239 which has been shown to enhance their overall experience and improve maternal and infant  
240 outcomes. NHS Scotland released the Health Improvement, Efficiency, Access to Services, and  
241 Treatment Appropriate (HEAT) initiative aimed to measure and improve the timeliness of  
242 access to antenatal care for pregnant women in Scotland.<sup>32</sup> Performance data against current  
243 local standards showed that Scotland met the target as the lowest performance even in areas  
244 with the highest levels of deprivation (measured by the Scottish Index of Multiple  
245 Deprivation<sup>33</sup> was 88.35% (i.e., 88% of expectant mothers had scheduled antenatal care  
246 appointments by the 12th week of pregnancy for the year ending March 2021).

247 A broad range of ongoing audit, legislative, and improvement efforts have been undertaken  
248 with the aim to improve clinical standards and outcomes throughout Scotland. The Maternal  
249 and Children's Quality Improvement Collaborative (MCQIC), initiated in 2013 as part of the  
250 Scottish Patient Safety Programme, is one such initiative.<sup>34</sup> Established in 2011, the Stillbirth  
251 Group aims to decrease stillbirth rates in Scotland by increasing awareness of risk factors,  
252 supporting research, and advocating for bereavement support and resources.<sup>35</sup> Another  
253 major audit is the Mothers and Babies: Reducing Risk through Audits and Confidential  
254 Enquiries in the UK (MBRRACE), established in 2013, which examines maternal deaths,

255 stillbirths, and infant deaths to facilitate continuous quality improvement efforts.<sup>36</sup>  
256 Additionally, the Each Baby Counts program by the Royal College of Obstetricians and  
257 Gynaecologists (RCOG) aims to minimize the occurrence of preventable adverse incidents  
258 during term labor.<sup>37</sup> In addition, there are several other public health initiatives that  
259 progressed in Scotland to reduce health disparities among diverse populations. These include  
260 the WHO self-assessment audit tool to measure the quality of health promotion activity of  
261 maternity services in Scotland.<sup>35</sup> The Smoking, Health and Social Care (Scotland) Act Scottish  
262 Government<sup>38</sup> imposed legislative measures to reduce smoking rates, exposure to second-  
263 hand smoke, and smoking cessation support as it recognizes the adverse effects of smoking  
264 on maternal and infant health. This legislation resulted in a wide public health impact.<sup>39</sup>

### 265 *Georgia*

266 Several key policies have impacted maternal health care in the state of Georgia, USA. The  
267 expansion of Medicaid eligibility for pregnant women has been a critical policy in improving  
268 access to maternal healthcare. This policy aims to provide coverage for low-income pregnant  
269 women, ensuring access to prenatal care.

270 Like Scotland, Georgia has implemented policies promoting continuity of care with the same  
271 healthcare provider with the aim to establish trust and rapport between healthcare  
272 professionals and expectant mothers. The Certified Nurse-Midwife (CNM) Involvement in  
273 Care played a vital role in maternal care, offering a more holistic and lower medical  
274 intervention approaches to childbirth.

275 Other programs and initiatives also had positive impacts on maternal and child health in  
276 Georgia. Centering Pregnancy: A Model for Group Prenatal Care is a group-based prenatal  
277 care model that offers support, education, and a community for mothers-to-be.<sup>40</sup> Group  
278 prenatal care consisted of sessions with a nurse and midwife where basic prenatal physical  
279 assessments and issues such as nutrition, common discomforts, labor and delivery, infant  
280 care, and postpartum were addressed. Significant collaborations have been established  
281 between clinical care, public health, and policy entities at Grady. Examples include initiatives  
282 like the Grady Healthy Baby Initiative, aimed at addressing underlying factors contributing to  
283 adverse maternal and fetal outcomes, as well as disparities among vulnerable populations,  
284 both locally and statewide.<sup>41</sup>

285 Georgia is also involved in perinatal quality collaboratives aimed at improving the quality of  
286 care for mothers and infants. These collaboratives focus on evidence-based practices and  
287 guidelines to address maternal and infant outcomes. The Perinatal Case Management  
288 programs was introduced in April 2014 to identify and address the complex needs of high-risk  
289 pregnant women by providing comprehensive support to reduce the risk of adverse outcomes  
290 such as preterm births.<sup>42</sup> The CDC initiated the Pregnancy Mortality Surveillance System  
291 (PMSS) in 1986 to conduct national surveillance of all pregnancy-related deaths. At the state  
292 or local level, the Maternal Mortality Review Committees (MMRCs) would convene to  
293 investigate and review maternal deaths. These committees were set up to investigate the  
294 causes and risk factors for pregnancy-related deaths in the US and develop strategies to  
295 prevent future mortalities.

296 Georgia was one of the first states in the US to adopt telemedicine through the  
297 implementation of the Georgia Telehealth Law in 2005. This initiative aimed to establish clear  
298 definitions and a legal structure for providing remote medical services to overcome  
299 geographical challenges posed by rurality.<sup>43</sup>

300 *Tertiary level – regional or specific city or locality-based level*

301 Different models of care delivery have been implemented in Scotland and Georgia including  
302 traditional physician care, group-based prenatal care, and midwifery-led care. The  
303 overarching goal is to provide person-centered care and higher satisfaction among expectant  
304 mothers.<sup>44</sup> All pregnant women will see a range of health professionals depending on their  
305 care needs. While the majority of births occur in hospitals, the choices available for birthplace  
306 can vary depending on the locality and are often influenced by the individual preferences of  
307 the woman. In Scotland, approximately 2.6% of births occur in community settings, and  
308 antenatal care can be provided in both community and hospital settings. In the United States,  
309 nearly all births (98%) take place in hospitals,<sup>45</sup> with approximately 91% attended by  
310 physicians and 8.7% attended by midwives, a statistic that is unique to the US.<sup>46</sup> In contrast,  
311 many other high-income countries rely more heavily on midwifery care and have fewer  
312 hospital births.<sup>47</sup>

313 Every maternity unit in Scotland has obtained accreditation from the UNICEF Baby Friendly  
314 Initiative (BFI).<sup>48</sup> Scotland's four largest neonatal units are close to achieving full

315 implementation of the neonatal BFI standards, while other units are working towards this  
316 goal. Additionally, a Scotland-wide donor milk bank was established in 2013 to ensure  
317 equitable access to breast milk for the smallest and most vulnerable infants across the  
318 country.<sup>49</sup> In Georgia, the involvement of peer counsellors, particularly in breastfeeding  
319 support programs has been beneficial in encouraging and supporting breastfeeding which has  
320 documented health benefits for both mothers and infants.

321 **Discussion**

322 Our findings demonstrate the varied approaches of the Georgia and Scotland health systems  
323 and their influence on maternal care and wellbeing. Both systems share a commitment  
324 towards providing continuity of care for the expectant mothers in their regions,  
325 acknowledging the clinical benefits of promoting deepened person-centered trust. Their  
326 differences originate at a national level resulting in macro-level barriers and facilitators to  
327 health (e.g., availability of infrastructure, facilities, and medical staff).<sup>50</sup> Scotland has a heavily  
328 guideline-driven approach to its medical practice due to its centralized health system  
329 framework, as opposed to the largely privatized US healthcare market, which subsequently  
330 allows additional room for personalized care. Furthermore, the US healthcare system is more  
331 physician-centered compared to its Scottish counterpart, which prioritizes midwifery-  
332 centered care in the absence of high-risk comorbidities or complications. This discrepancy in  
333 practitioner emphasis allows the differences to pervade into the regional level, as  
334 demonstrated by the variations in delivery setting: births in the non-hospital setting are not  
335 uncommon in Scotland, while the vast majority of births in the US occur in physician-led  
336 hospitals.

337 Georgia has one of the more restrictive state policies regarding the licensing of midwives,  
338 with the criminalization of midwifery practice without a nursing credential. As of 2018, there  
339 are only 550 Certified Nurse Midwives (CNMs) in the state of Georgia<sup>51</sup> and they face  
340 challenges such as identifying physician collaborators and obtaining hospital privileges,  
341 making it extremely challenging to access midwifery care. Additionally, 73% of counties in  
342 Georgia lack hospitals that provide maternity care, with 36.7% being classified as 'maternity  
343 care deserts'.<sup>52</sup> In response to this maternal health crisis, Georgia has implemented several  
344 initiatives, including a Maternal Mortality Review Committee (MMRC), and a Perinatal Quality  
345 Collaborative (GaPQC) involving key stakeholders.

346 The demographic and geographic variations between Georgia and Scotland may also explain  
347 their varied policies. Georgia's estimated 2022 population is 10.9 million. While most of the  
348 inhabitants are White (59%), 33% are Black/African American, 10% are Hispanic, and 4.8% are  
349 Asian. A significant portion of the state's population, 39.7%, live in rural parts of the state with  
350 higher poverty rate compared to urban areas of the state (19% vs. 13%) based on American

351 Community Survey (ACS) data.<sup>53</sup> Scotland, by comparison, has a smaller population of 5.4  
352 million, with only 17% of its population living in rural areas of the country.<sup>54</sup> The racial  
353 breakdown of Scotland's population is more homogenous to that of Georgia, with 96% of its  
354 population being White.<sup>55</sup> Such variations in spatial barriers and socioeconomic status are  
355 important when considering the differences in birth outcomes. The larger, more diverse, and  
356 more rural population in Georgia can present with more obstetric and neonatal challenges,  
357 leading to a higher need for maternal care services.

358 The different healthcare infrastructures present in Georgia and Scotland may also be due to  
359 the conceptual framework underlying their respective public health systems and the  
360 populations each system was originally designed to serve. The US public healthcare system,  
361 through programs known as Medicare and Medicaid, was established in the 1965 to provide  
362 care to the elderly and others who were deemed medically and financially disadvantaged in  
363 the setting of rising healthcare costs.<sup>56</sup> Despite these programs, the US healthcare system  
364 continues to be driven by the private sector, with employer-based coverage currently being  
365 the main source of health insurance for working families.<sup>57</sup> As such, social determinants of  
366 health including economic stability, timely access to health care providers and the quality of  
367 maternal care are known risk factors for maternal outcomes.<sup>4</sup> A recent survey in Georgia  
368 revealed that improving the affordability of maternal health care and access to insurance  
369 coverage remain the top priorities to tackle this health crisis.<sup>58</sup> On the other hand, the UK  
370 National Health Service (NHS) was implemented in 1948 to provide preventative and curative  
371 healthcare to its entire population after the nation endured large numbers of its population  
372 requiring medical attention during World War II. Therefore, with the UK's emphasis on public  
373 healthcare coverage for a broader target population, Scotland's inhabitants benefit from a  
374 more accessible and affordable healthcare system compared to their American  
375 counterparts.<sup>59</sup>

376 This study is the first to comparatively explore health policies between Georgia and Scotland,  
377 two regions with vastly different healthcare systems. Furthermore, no studies explore varied  
378 policies between the broader US and UK health systems. Our study utilizes primary literature,  
379 such as clinical guidelines and legislative documents, and secondary literature, such as news  
380 articles and expert opinions. While this allows us to gain a holistic insight through objective  
381 information regarding Scotland and Georgia's policies as well as subjective information

382 regarding their impact on their respective communities, the use of grey literature such as  
383 news and expert opinions may introduce some bias. One strength is our multi-layered  
384 approach to policy impact, allowing us to clearly demonstrate how healthcare policy has a  
385 trickle-down effect on the provision of healthcare services from the national to the local level.  
386 However, the study's focus on maternal policies may overlook other important factors such  
387 as individual health behaviors and community-level determinants of health. Furthermore, the  
388 study was limited by the lack of literature on rural health policies in Scotland which  
389 demonstrates decreased rurality-centered policy in Scotland, representing an area for  
390 benchmarking.

391 The results of this study have potential to shape approaches to maternal care and can be  
392 utilized to provide recommendations for future clinical practice in Georgia and Scotland. For  
393 example, staffing shortages have long been a contributor to the maternal mortality rate in  
394 Georgia.<sup>24</sup>

395 Scotland was able to address this concern through increased mid-level provider involvement  
396 in uncomplicated cases, which increases access to basic prenatal needs across the country  
397 and subsequently boosts obstetrician availability for more complex cases (Scottish  
398 Government, 2017).<sup>12</sup> These findings align with current discussions regarding licensure for  
399 midwives and maternity care providers, reflecting the timeliness and relevance of this textual  
400 synthesis. The evidence suggest that an expansion in midwifery licensure and training,  
401 extended scope of practice, and integrated community-based practice is equitable and cost-  
402 effective in reducing the gap in maternal health.<sup>47,51,52,60</sup> While these changes may affect  
403 policy at the regional level, broader changes at the legislative or national level would require  
404 fundamental changes to their respective socioeconomic and healthcare system.

## 405 **Conclusion**

406 This study has identified an important gap in literature addressing the health challenges faced  
407 in rural Scotland. This information is necessary to understand the current operations and  
408 challenges of antenatal and maternal care in those areas and to provide an important area of  
409 comparison to Georgia. Additional research, incorporating population-based data, is needed  
410 to fully understand the impact of policy on maternal and child health outcomes in rural  
411 Georgia and rural Scotland. It is also important to explore additional indicators of healthcare  
412 quality, including patient satisfaction and the availability of healthcare resources.

**Conflicts of Interest:** The authors declare no conflict of interest.

**Ethics statement:** No ethical or IRB approval was needed because this is a study of secondary data evidence synthesis.

**Funding:** This study was funded by Augusta University through their intramural grant.



## References

1. Tikkanen R, Gunja M, FitzGerald M, Zephyrin L. Maternal Mortality Maternity Care in the United States Compared 10 Other Countries. The Commonwealth Fund Issue Briefs. <https://www.commonwealthfund.org/publications/issue-briefs/2020/nov/maternal-mortality-maternity-care-us-compared-10-countries>. Published November 18, 2020. Accessed March 16, 2022.
2. Pregnancy Mortality Surveillance System | Maternal and Infant Health | CDC. <https://www.cdc.gov/reproductivehealth/maternal-mortality/pregnancy-mortality-surveillance-system.htm>. Accessed December 27, 2023.
3. Hoyert DL. Maternal Mortality Rates in the United States, 2021. :2021. doi:10.15620/cdc:113967
4. Armstrong-Mensah EA, Dada D, Bowers A, Muhammad A, Nnoli C. Geographic, Health Care Access, Racial Discrimination, and Socioeconomic Determinants of Maternal Mortality in Georgia, United States. *International Journal of Maternal and Child Health and AIDS*. 2021;10(2):278. doi:10.21106/IJMA.524
5. Stats of the States - Infant Mortality. 2021. [https://www.cdc.gov/nchs/pressroom/sosmap/infant\\_mortality\\_rates/infant\\_mortality.htm](https://www.cdc.gov/nchs/pressroom/sosmap/infant_mortality_rates/infant_mortality.htm). Accessed December 27, 2023.
6. Chinn JJ, Eisenberg E, Artis Dickerson S, et al. Maternal mortality in the United States: research gaps, opportunities, and priorities. *Am J Obstet Gynecol*. 2020;223(4):486-492.e6. doi:10.1016/J.AJOG.2020.07.021
7. Pregnancy, births and maternity: Stillbirth, neonatal and infant deaths and maternal death. Scottish Public Health Observatory. <https://www.scotpho.org.uk/population-dynamics/pregnancy-births-and-maternity/data/pregnancy-outcomes-2-live-births-and-infant-and-maternal-deaths/>. Published 2023. Accessed December 27, 2023.
8. Hernandez ND, Aina AD, Baker LJ, et al. Maternal health equity in Georgia: a Delphi consensus approach to definition and research priorities. *BMC Public Health*. 2023;23(1):1-10. doi:10.1186/S12889-023-15395-3/TABLES/2
9. Filippi V, Chou D, Ronsmans C, Graham W, Say L. Levels and Causes of Maternal Mortality and Morbidity. *Disease Control Priorities, Third Edition (Volume 2): Reproductive, Maternal, Newborn, and Child Health*. April 2016:51-70. doi:10.1596/978-1-4648-0348-2\_CH3
10. Human development index. <https://www.who.int/data/nutrition/nlis/info/human-development-index>. Accessed December 27, 2023.
11. Emanuel EJ, Persad G, Upshur R, et al. Fair Allocation of Scarce Medical Resources in the Time of Covid-19. *New England Journal of Medicine*. 2020;382(21):2049-2055. doi:10.1056/NEJMSB2005114/SUPPL\_FILE/NEJMSB2005114\_DISCLOSURES.PDF
12. Scottish Government. Scottish Health Survey 2019 - volume 1: main report. *Closing the poverty-related attainment gap: progress report 2016 to 2021*. 2021:1-253. <http://www.gov.scot/publications/scottish-health-survey-2019-volume-1-main-report/>. Accessed December 27, 2023.
13. CMO's annual report 2012: Our Children Deserve Better: CMO's Summary as a web page - GOV.UK. <https://www.gov.uk/government/publications/chief-medical-officers-annual-report-2012-our-children-deserve-better-prevention-pays/cmoss-annual-report-2012-our-children-deserve-better-cmos-summary-as-a-web-page>. Accessed December 27, 2023.

14. WHO WHO. Improving maternal and newborn health and survival and reducing stillbirth - Progress report 2023. 2023;34. <https://www.who.int/publications/i/item/9789240073678>. Accessed December 27, 2023.
15. Lübbecke A, Carr AJ, Hoffmeyer P. Registry stakeholders. *EFORT Open Rev.* 2019;4(6):330. doi:10.1302/2058-5241.4.180077
16. Aromataris E, Munn Z. Introduction to Scoping reviews. *JBIManuals for Evidence Synthesis.* 2020:2018-2021. <https://wiki.jbi.global/display/MANUAL/11.1+Introduction+to+Scoping+reviews>. Accessed December 27, 2023.
17. Godin K, Stapleton J, Kirkpatrick SI, Hanning RM, Leatherdale ST. Applying systematic review search methods to the grey literature: A case study examining guidelines for school-based breakfast programs in Canada. *Syst Rev.* 2015;4(1):1-10. doi:10.1186/S13643-015-0125-0/FIGURES/2
18. NHS Scotland | UKHDRA. <https://ukhealthdata.org/members/nhs-scotland/>. Accessed December 27, 2023.
19. The Scottish Government. The best start: five-year plan for maternity and neonatal care. 2017;(January):121-131. <http://www.gov.scot/publications/best-start-five-year-forward-plan-maternity-neonatal-care-scotland/>. Accessed December 27, 2023.
20. Donald A. Barr MP. Introduction to US Health Policy. *Introduction to US Health Policy.* May 2023. doi:10.56021/9781421446462
21. Warren MD, Kavanagh LD. Over a Century of Leadership for Maternal and Child Health in the United States: An Updated History of the Maternal and Child Health Bureau. *Matern Child Health J.* March 2023:1-15. doi:10.1007/S10995-023-03629-0/TABLES/4
22. Eliason EL. Adoption of Medicaid Expansion Is Associated with Lower Maternal Mortality. doi:10.1016/j.j.whi.2020.01.005
23. The Share of Americans without Health Insurance in 2022 Matched a Record Low. <https://www.pgpf.org/blog/2023/11/the-share-of-americans-without-health-insurance-in-2022-matched-a-record-low>. Accessed December 27, 2023.
24. Miteniece E, Pavlova M, Shengelia L, Rechel B, Groot W. Barriers to accessing adequate maternal care in Georgia: a qualitative study. doi:10.1186/s12913-018-3432-z
25. CMS. Report to Congress on Medicaid and CHIP Medicaid and CHIP Payment and Access Commission. 2018.
26. Deutchman M, Macaluso F, Bray E, et al. The impact of family physicians in rural maternity care. *Birth.* 2022;49(2):220-232. doi:10.1111/BIRT.12591
27. EXPERT GROUP ON ACUTE MATERNITY SERVICES REFERENCE REPORT.
28. Scottish Government. A Refreshed Framework for Maternity Care in Scotland: The Maternity Services Action Group. *Scottish Government.* 2009;1(1):1-86. <http://www.gov.scot/publications/refreshed-framework-maternity-care-scotland-maternity-services-action-group/>. Accessed December 27, 2023.
29. Neonatal Care in Scotland: A Quality Framework. <http://www.gov.scot/publications/neonatal-care-scotland-quality-framework/>. Accessed December 27, 2023.

30. Department of Health. Changing Childbirth: Report of the Expert Maternity Group. 1993:112. <https://search.worldcat.org/title/277249987>. Accessed December 27, 2023.
31. National service framework: children, young people and maternity services - GOV.UK. <https://www.gov.uk/government/publications/national-service-framework-children-young-people-and-maternity-services>. Accessed December 27, 2023.
32. National Performance Framework | National Performance Framework. <https://nationalperformance.gov.scot/>. Accessed December 27, 2023.
33. Scottish Index of Multiple Deprivation 2020. <http://www.gov.scot/collections/scottish-index-of-multiple-deprivation-2020/>. Accessed December 27, 2023.
34. Scottish Patient Safety Programme (SPSP) | ihub | Health and social care improvement in Scotland - Scottish Patient Safety Programme (SPSP). <https://ihub.scot/improvement-programmes/scottish-patient-safety-programme-spsp/>. Accessed December 27, 2023.
35. STANDARDS FOR IMPROVING QUALITY OF MATERNAL AND NEWBORN CARE IN HEALTH FACILITIES.
36. Manktelow BN, Smith LK, Evans A, et al. Maternal, Newborn and Infant Clinical Outcome Review Programme MBRRACE-UK Perinatal Mortality Surveillance Report UK Perinatal Deaths for births from January to December 2013 Supplementary Report UK Trusts and Health Boards. 2015.
37. RCOG 2021 Each baby counts: 2020 final progress report. <https://www.rcog.org.uk/media/a4eg2xnm/ebc-2020-final-progress-report.pdf>. Published 2021. Accessed December 27, 2023.
38. Smoking, Health and Social Care (Scotland) Act 2005.
39. Hyland A, Hassan LM, Higbee C, et al. The impact of smokefree legislation in Scotland: results from the Scottish ITC Scotland/UK longitudinal surveys. doi:10.1093/eurpub/ckn141
40. Reid J. Centering Pregnancy: a model for group prenatal care. *Nurs Womens Health*. 2007;11(4):382-388. doi:10.1111/j.1751-486X.2007.00194.x
41. Jamieson DJ, Haddad LB. What Obstetrician-Gynecologists Should Know About Population Health. doi:10.1097/AOG.0000000000002638
42. Bell J. Perinatal Case Management. *Journal of Obstetric, Gynecologic & Neonatal Nursing*. 2016;45(3):S8. doi:10.1016/j.jogn.2016.03.034
43. Telemedicine in Georgia: Law, Rules, Regulations, and Policies | Blog. <https://blog.curogram.com/telemedicine-georgia>. Accessed December 27, 2023.
44. Brady S, Bogossian F, Gibbons KS. Achieving international consensus on the concept of woman-centred care: A Delphi study. 2023. doi:10.1016/j.wombi.2023.06.001
45. National Academies of Sciences E and M. Birth Settings in America: Outcomes, Quality, Access, and Choice. *Birth Settings in America*. February 2020. doi:10.17226/25636
46. Caughey AB, Cheyney M. Home and birth center birth in the United States: Time for greater collaboration across models of care. *Obstetrics and Gynecology*. 2019;133(5):1033-1050. doi:10.1097/AOG.0000000000003215

47. Sangy MT, Duaso M, Feeley C, Walker S. Barriers and facilitators to the implementation of midwife-led care for childbearing women in low- and middle-income countries: A mixed-methods systematic review. *Midwifery*. 2023;122. doi:10.1016/J.MIDW.2023.103696
48. The Scottish Government. Scottish maternal and infant nutrition survey 2017. 3/10/2017. 2018:60. <http://www.gov.scot/publications/scottish-maternal-infant-nutrition-survey-2017/>. Accessed December 27, 2023.
49. Funding for breast milk bank. <http://www.gov.scot/news/funding-for-breast-milk-bank/>. Accessed December 27, 2023.
50. Smith T, McNeil K, Mitchell R, Boyle B, Ries N. A study of macro-, meso- and micro-barriers and enablers affecting extended scopes of practice: The case of rural nurse practitioners in Australia. *BMC Nurs*. 2019;18(1):1-12. doi:10.1186/S12912-019-0337-Z/FIGURES/1
51. Hallerman T. Black midwives carry on traditions but fight for legitimacy in Georgia. <https://www.ajc.com/life/black-midwives-carry-on-traditions-but-fight-for-legitimacy-in-georgia/FQLWESLD2JF47OEBMZUKM4GOCA/>. Accessed December 27, 2023.
52. Registration data reports - The Nursing and Midwifery Council. <https://www.nmc.org.uk/about-us/reports-and-accounts/registration-statistics/>. Accessed December 27, 2023.
53. Georgia - Rural Population - 2023 Data 2024 Forecast 1960-2022 Historical. <https://tradingeconomics.com/georgia/rural-population-percent-of-total-population-wb-data.html>. Accessed December 27, 2023.
54. Scottish Government. Rural Scotland Key Facts 2021. *Closing the poverty-related attainment gap: progress report 2016 to 2021*. 2021:1-253. <http://www.gov.scot/publications/rural-scotland-key-facts-2021/>. Accessed December 27, 2023.
55. Ethnicity | Scotland's Census. <https://www.scotlandscensus.gov.uk/census-results/at-a-glance/ethnicity/>. Accessed December 27, 2023.
56. Moore JD, Smith DG. Legislating Medicaid: Considering Medicaid and Its Origins. *Health Care Financ Rev*. 2005;27(2):45. </pmc/articles/PMC4194918/>. Accessed December 27, 2023.
57. Hoffman C, Paradise J. Health insurance and access to health care in the United States. *Ann N Y Acad Sci*. 2008;1136:149-160. doi:10.1196/ANNALS.1425.007
58. New survey reveals insight into Georgia's maternal health crisis. [https://news.emory.edu/stories/2023/11/hs\\_maternal\\_health\\_symposium\\_29\\_11\\_2023/story.html](https://news.emory.edu/stories/2023/11/hs_maternal_health_symposium_29_11_2023/story.html). Accessed December 27, 2023.
59. Greengross P, Grant K, Collini E. The history and development of the UK National Health Service 1948 - 1999. 1948. [www.healthsystemsrc.org](http://www.healthsystemsrc.org). Accessed December 27, 2023.
60. Yoder H, Hardy LR. Midwifery and Antenatal Care for Black Women: A Narrative Review. *Sage Open*. 2018;8(1). doi:10.1177/2158244017752220
61. Vladutiu CJ, Mobley SC, Ji X, et al. A Methodological Approach for Evaluating the Enterprise Community Healthy Start Program in Rural Georgia: An Analysis Using Linked PRAMS, Birth Records and Program Data. *Matern Child Health J*. 2021;25(10):1516. doi:10.1007/S10995-021-03205-4
62. Vanderlaan J, Edwards JA, Dunlop A. Geospatial variation in caesarean delivery. *Nurs Open*. 2020;7(2):627-633. doi:10.1002/NOP2.433

63. Rust G, Nembhard WN, Nichols M, et al. Racial and ethnic disparities in the provision of epidural analgesia to Georgia Medicaid beneficiaries during labor and delivery. *Am J Obstet Gynecol*. 2004;191(2):456-462. doi:10.1016/J.AJOG.2004.03.005
64. Pinto M, Rochat R, Hennink M, Zertuche AD, Spelke B. Bridging the Gaps in Obstetric Care: Perspectives of Service Delivery Providers on Challenges and Core Components of Care in Rural Georgia. *Matern Child Health J*. 2016;20(7):1349-1357. doi:10.1007/S10995-016-1995-Z/FIGURES/3
65. Mosley EA, Pratt M, Besera G, et al. Evaluating Birth Outcomes From a Community-Based Pregnancy Support Program for Refugee Women in Georgia. *Front Glob Womens Health*. 2021;2. doi:10.3389/FGWH.2021.655409
66. Mobley SC, Thomas SD, Sutherland DE, Hudgins J, Ange BL, Johnson MH. Maternal Health Literacy Progression Among Rural Perinatal Women. *Matern Child Health J*. 2014;18(8):1881. doi:10.1007/S10995-014-1432-0
67. Meyer E, Hennink M, Rochat R, et al. Working Towards Safe Motherhood: Delays and Barriers to Prenatal Care for Women in Rural and Peri-Urban Areas of Georgia. *Matern Child Health J*. 2016;20(7):1358-1365. doi:10.1007/S10995-016-1997-X/TABLES/3
68. Grant JH, Handwerk K, Baker K, Milling VL, Barlow S, Vladutiu CJ. Implementing Group Prenatal Care in Southwest Georgia Through Public–Private Partnerships. *Matern Child Health J*. 2018;22(11):1535-1542. doi:10.1007/S10995-018-2576-0/TABLES/3
69. Gavin NI, Benedict MB, Adams EK. Health service use and outcomes among disabled Medicaid pregnant women. *Women's Health Issues*. 2006;16(6):313-322. doi:10.1016/J.WHI.2006.10.003
70. Daymude AEC, Daymude JJ, Rochat R. Labor and Delivery Unit Closures in Rural Georgia from 2012 to 2016 and the Impact on Black Women: A Mixed-Methods Investigation. *Matern Child Health J*. 2022;26(4):796-805. doi:10.1007/S10995-022-03380-Y/TABLES/3
71. Bruce FC, Berg CJ, Joski PJ, et al. Extent of Maternal Morbidity in a Managed Care Population in Georgia. *Paediatr Perinat Epidemiol*. 2012;26(6):497. doi:10.1111/J.1365-3016.2012.01318.X
72. Barkin JL, Bloch JR, Smith KER, et al. Knowledge of and Attitudes Toward Perinatal Home Visiting in Women with High-Risk Pregnancies. *J Midwifery Womens Health*. 2021;66(2):227-232. doi:10.1111/JMWH.13204
73. Zertuche AD, Spelke B, Julian Z, Pinto M, Rochat R. Georgia Maternal and Infant Health Research Group (GMIHRG): Mobilizing Allied Health Students and Community Partners to Put Data into Action. *Matern Child Health J*. 2016;20(7):1323-1332. doi:10.1007/S10995-016-1996-Y/FIGURES/3
74. Kramer MR, Waller LA, Dunlop AL, Hogue CR. Housing Transitions and Low Birth Weight Among Low-Income Women: Longitudinal Study of the Perinatal Consequences of Changing Public Housing Policy. *Am J Public Health*. 2012;102(12):2255. doi:10.2105/AJPH.2012.300782
75. Jincharadze N, Kazakhashvili N, Sakvarelidze I. PROBLEMS OF IMPROVING ANTENATAL MONITORING OF PREGNANT WOMEN IN THE PRIMARY HEALTH CARE SYSTEM IN GEORGIA. *Georgian Med News*. 2018;283(1):118-123.
76. Jamieson DJ, Haddad LB. What Obstetrician-Gynecologists Should Know About Population Health. doi:10.1097/AOG.0000000000002638

77. Alzate M. Welfare recipients' quality of life: lessons from the United Nations' Human Development Index for the US welfare policy. *European Journal of Social Work*. 2006;9(1):85-101. doi:10.1080/13691450500480722
78. Lanier P, Kennedy S, Snyder A, et al. Prenatal Syphilis Screening Among Medicaid Enrollees in 6 Southern States. *Am J Prev Med*. 2022;62(5):770-776. doi:10.1016/J.AMEPRE.2021.11.011
79. Crowther S, MacIver E, Lau A. Policy, evidence and practice for post-birth care plans: a scoping review. *BMC Pregnancy Childbirth*. 2019;19(1). doi:10.1186/S12884-019-2274-Y
80. Till SR, Everetts D, Haas DM. Incentives for increasing prenatal care use by women in order to improve maternal and neonatal outcomes. *Cochrane Database Syst Rev*. 2015;2015(12). doi:10.1002/14651858.CD009916.PUB2
81. Harron K, Verfuenden M, Ibiebele I, et al. Preterm birth, unplanned hospital contact, and mortality in infants born to teenage mothers in five countries: An administrative data cohort study. *Paediatr Perinat Epidemiol*. 2020;34(6):645-654. doi:10.1111/PPE.12685
82. McInnes RJ, Aitken-Arbuckle A, Lake S, Hollins Martin C, MacArthur J. Implementing continuity of midwife carer – just a friendly face? A realist evaluation. *BMC Health Serv Res*. 2020;20(1). doi:10.1186/S12913-020-05159-9
83. Young D, Shields N, Holmes A, Turnbull D, Twaddle S. A new style of midwife-managed antenatal care: costs and satisfaction. *Br J Midwifery*. 1997;5(9):540-545. doi:10.12968/BJOM.1997.5.9.540
84. Pitchforth E, Watson V, Tucker J, et al. Models of intrapartum care and women's trade-offs in remote and rural Scotland: a mixed-methods study. *BJOG*. 2008;115(5):560-569. doi:10.1111/J.1471-0528.2007.01516.X
85. Pitchforth E, Van Teijlingen E, Watson V, et al. "Choice" and place of delivery: a qualitative study of women in remote and rural Scotland. *BMJ Qual Saf*. 2009;18(1):42-48. doi:10.1136/QSHC.2007.023572
86. McInnes RJ, Martin CJH, MacArthur J. Midwifery continuity of carer: Developing a realist evaluation framework to evaluate the implementation of strategic change in Scotland. *Midwifery*. 2018;66:103-110. doi:10.1016/J.MIDW.2018.07.007
87. McGuire M, Dagge-Bel F, Purton P, Thompson M. Shaping maternity services in Scotland. <https://doi.org/10.12968/bjom2004121116687>. 2013;12(11):674-678. doi:10.12968/BJOM.2004.12.11.16687
88. MacLachlan A, Crawford K, Shinwell S, Nixon C, Henderson M. Recruiting hard-to-reach pregnant women at high psychosocial risk: strategies and costs from a randomised controlled trial. *Trials*. 2021;22(1):1-15. doi:10.1186/S13063-021-05348-9/TABLES/6
89. Hundley V, Rennie AM, Fitzmaurice A, Graham W, Van Teijlingen E, Penney G. A national survey of women's views of their maternity care in Scotland. *Midwifery*. 2000;16(4):303-313. doi:10.1054/midw.2000.0231
90. Hundley V, Penney G, Fitzmaurice A, VanTeijlingen E, Graham W. A comparison of data obtained from service providers and service users to assess the quality of maternity care. *Midwifery*. 2002;18(2):126-135. doi:10.1054/midw.2002.0306
91. Frank J, Bromley C, Doi L, et al. Seven key investments for health equity across the lifecourse: Scotland versus the rest of the UK. *Soc Sci Med*. 2015;140:136-146. doi:10.1016/J.SOCSCIMED.2015.07.007

92. Cheyne H, Abhyankar P, McCourt C. Empowering change: realist evaluation of a Scottish Government programme to support normal birth. *Midwifery*. 2013;29(10):1110-1121. doi:10.1016/J.MIDW.2013.07.018
93. Barnett C. WHO Health Promoting Hospitals: Maternity services in Scotland. *Br J Midwifery*. 2007;15(10):647-649. doi:10.12968/BJOM.2007.15.10.27351
94. SMOKING BAN REDUCED PREGNANCY COMPLICATIONS, SAYS STUDY. *University of Glasgow News*. March 2012.
95. Puthussery S. Perinatal outcomes among migrant mothers in the United Kingdom: Is it a matter of biology, behaviour, policy, social determinants or access to health care? *Best Pract Res Clin Obstet Gynaecol*. 2016;32:39-49. doi:10.1016/J.BPOBGYN.2015.09.003
96. Turienzo CF, Bick D, Briley AL, et al. Midwifery continuity of care versus standard maternity care for women at increased risk of preterm birth: A hybrid implementation–effectiveness, randomised controlled pilot trial in the UK. *PLoS Med*. 2020;17(10). doi:10.1371/JOURNAL.PMED.1003350
97. Gale NK, Kenyon S, MacArthur C, Jolly K, Hope L. Synthetic social support: Theorizing lay health worker interventions. *Soc Sci Med*. 2018;196:96-105. doi:10.1016/J.SOCSCIMED.2017.11.012
98. Courtemanche C, Marton J, Ukert B, Yelowitz A, Zapata D. Early Impacts of the Affordable Care Act on Health Insurance Coverage in Medicaid Expansion and Non-Expansion States.
99. Letter from AHA and Other National Organizations to Congressional Leaders on Two Maternal Health Bills. *American Hospital Association*.
100. Sutton MY, Anachebe NF, Lee R, Skanes H. Racial and Ethnic Disparities in Reproductive Health Services and Outcomes, 2020. *Obstetrics and Gynecology*. 2021;137(2):225. doi:10.1097/AOG.0000000000004224
101. Ranjit A, Jiang W, Zhan T, et al. Intrapartum obstetric care in the United States military: Comparison of military and civilian care systems within TRICARE. *Birth*. 2017;44(4):337-344. doi:10.1111/BIRT.12298
102. Palmer I, Chronicle E. Cognitive processing in migraine: a failure to find facilitation in patients with aura. <http://journals.sagepub.com.proxy.library.emory.edu/doi/pdf/10.1046/j.1468-2982.1998.1803125.x>.
103. Gavin NI, Adams EK, Hartmann KE, Benedict MB, Chireau M. Racial and Ethnic Disparities in the Use of Pregnancy-Related Health Care Among Medicaid Pregnant Women. *Matern Child Health J*. 2004;8(3).
104. Stanhope KK, Suglia SF, Hogue CJR, Leon JS, Comeau DL, Kramer MR. Spatial Variation in Very Preterm Birth to Hispanic Women Across the United States: The Role of Intensified Immigration Enforcement. *Ethn Dis*. 2021;31(Suppl 1):333. doi:10.18865/ED.31.S1.333
105. Stanhope KK, Hogue CR, Suglia SF, Leon JS, Kramer MR. Restrictive sub-federal immigration policy climates and very preterm birth risk among US-born and foreign-born Hispanic mothers in the United States, 2005-2016. *Health Place*. 2019;60. doi:10.1016/J.HEALTHPLACE.2019.102209
106. Merkt PT, Kramer MR, Goodman DA, et al. Urban-rural differences in pregnancy-related deaths, United States, 2011-2016. *Am J Obstet Gynecol*. 2021;225(2):183.e1-183.e16. doi:10.1016/J.AJOG.2021.02.028

107. Li J, Pesko MF, Unruh MA, Jung HY. Effect of the Medicaid Primary Care Rate Increase on Prenatal Care Utilization Among Medicaid-Insured Women. 2019;23:1564-1572. doi:10.1007/s10995-019-02804-6
108. Kroelinger CD, Okoroh EM, Goodman DA, Lasswell SM, Barfield WD. Comparison of state risk-appropriate neonatal care policies with the 2012 AAP policy statement. *Journal of Perinatology*. 2018;38:411-420. doi:10.1038/s41372-017-0006-6
109. Khan A, DeYoung SE. Maternal health services for refugee populations: Exploration of best practices. *Glob Public Health*. 2019;14(3):362-374. doi:10.1080/17441692.2018.1516796
110. Jackson FM, Rashied-Henry K, Braveman P, et al. A Prematurity Collaborative Birth Equity Consensus Statement for Mothers and Babies. *Matern Child Health J*. 2020;24(10):1231-1237. doi:10.1007/S10995-020-02960-0
111. Grigorescu VI, D'Angelo D V., Harrison LL, Taraporewalla AJ, Shulman H, Smith RA. Implementation Science and the Pregnancy Risk Assessment Monitoring System. *J Womens Health*. 2014;23(12):989. doi:10.1089/JWH.2014.5047
112. Callaghan WM. Geographic variation of reproductive health indicators and outcomes in the United States: place matters. *Am J Obstet Gynecol*. 2014;211(3):278. doi:10.1016/J.AJOG.2014.06.043
113. Bullinger LR, Simon K, Edmonds BT. Coverage Effects of the ACA's Medicaid Expansion on Adult Reproductive-Aged Women, Postpartum Mothers, and Mothers with Older Children. *Matern Child Health J*. 2022;26(5):1104-1114. doi:10.1007/S10995-022-03384-8
114. Broussard DL, Sappenfield WB, Fussman C, Kroelinger CD, Grigorescu V. Core state preconception health indicators: A voluntary, multi-state selection process. *Matern Child Health J*. 2011;15(2):158-168. doi:10.1007/S10995-010-0575-X/TABLES/2
115. Barreto T, Li C, Chung YK, Jabbarpour Y, Baltrus P, Gaglioti A. Measuring State-Level Racial Inequity in Severe Maternal Morbidity in the Medicaid Population. *Matern Child Health J*. 2022;26(4):682-690. doi:10.1007/S10995-021-03192-6/TABLES/4
116. Adams EK, Johnston E. Insuring Women in the United States Before, During, and After Pregnancies. *Am J Public Health*. 2016;106(4).



## List of tables and figures

**Table 1.** Table of characteristics of included literature

**Figure 1.** PRISMA flowchart of included studies

**Figure 2.** Timeline of maternal policies and legislations in Scotland, UK

**Figure 3.** Timeline of maternal policies and legislations in Georgia, USA

**Table 1** Table of characteristics of included literature

| No. | Authors                                                 | Title                                                                                                                                                                    | Year | Country          | Aim of study                                                                                                                                                                         | Study design          | Study funding sources                                                                          | Population                         |
|-----|---------------------------------------------------------|--------------------------------------------------------------------------------------------------------------------------------------------------------------------------|------|------------------|--------------------------------------------------------------------------------------------------------------------------------------------------------------------------------------|-----------------------|------------------------------------------------------------------------------------------------|------------------------------------|
| 1   | Vladutiu, C., Mobley, S. Ji, X., et al. <sup>61</sup>   | A Methodological Approach for Evaluating the Enterprise Community Healthy Start Program in Rural Georgia: An Analysis Using Linked PRAMS, Birth Records and Program Data | 2021 | Georgia specific | To evaluate the Enterprise Community Healthy Start program in two rural Georgia counties                                                                                             | Cohort study          | Health Resources and Services Administration of the US Department of Health and Human Services | Mothers                            |
| 2   | Vanderlaan J., Edwards J., Dunlop A. <sup>62</sup>      | Geospatial variation in caesarean delivery                                                                                                                               | 2019 | Georgia specific | To evaluate the variation in caesarean delivery rates across counties in Georgia and to determine whether county-level characteristics were associated with clusters                 | Qualitative research  | a grant from the Alpha Epsilon chapter of Sigma Theta Tau                                      | Pregnant women in Georgia          |
| 3   | Rust G., Nembhard W., Nichols M, et al. <sup>63</sup>   | Racial and ethnic disparities in the provision of epidural analgesia to Georgia Medicaid beneficiaries during labor and delivery                                         | 2004 | Georgia specific | To measure racial and ethnic differences in the proportion of Medicaid patients who receive epidural analgesia during labor and delivery                                             | Systematic review     | N/A                                                                                            | Women receiving a vaginal delivery |
| 4   | Pinto M., Rochat R., Hennik M., et al. <sup>64</sup>    | Bridging the Gaps in Obstetric Care: Perspectives of Service Delivery Providers on Challenges and Core Components of Care in Rural Georgia                               | 2016 | Georgia specific | To describe challenges faced by obstetric providers in areas outside metro Atlanta and to identify core components of alternative models of care that can alleviate these challenges | Qualitative research  | N/A                                                                                            | Obstetric providers                |
| 5   | Mosley E A., Pratt, M., Besera G., et al. <sup>65</sup> | Evaluating Birth Outcomes from a Community-Based Pregnancy Support Program for Refugee Women in Georgia                                                                  | 2021 | Georgia specific | To evaluate the maternal health outcomes, child health outcomes, and breastfeeding intentions among the participants of the Embrace                                                  | Cross sectional study | This work was also made possible through the support of Collaborative for                      | Female refugee population          |

Table I

|   |                                                                  |                                                                                                                          |      |                  |                                                                                                                                                                                                                                                                            |                       |                                                                                                                                                                              |                                                                                                                                                |
|---|------------------------------------------------------------------|--------------------------------------------------------------------------------------------------------------------------|------|------------------|----------------------------------------------------------------------------------------------------------------------------------------------------------------------------------------------------------------------------------------------------------------------------|-----------------------|------------------------------------------------------------------------------------------------------------------------------------------------------------------------------|------------------------------------------------------------------------------------------------------------------------------------------------|
|   |                                                                  |                                                                                                                          |      |                  | Refugee Birth Support program in Clarkston, Georgia                                                                                                                                                                                                                        |                       | Gender and Reproductive Equity, a sponsored project of Rockefeller Philanthropy Advisors                                                                                     |                                                                                                                                                |
| 6 | Mobley S., Dixson Thomas S., Sutherland D., et al. <sup>66</sup> | Maternal Health Literacy Progression Among Rural Perinatal Women                                                         | 2014 | Georgia specific | To examine changes in maternal health literacy progression in women who received home visits by Registered Nurse Case Managers                                                                                                                                             | Systematic review     | N/A                                                                                                                                                                          | Rural, low-income, and high risk African-American and White mothers                                                                            |
| 7 | Meyer, E., Hennink, M., Rochat, R., et al. <sup>67</sup>         | Working Towards Safe Motherhood: Delays and Barriers to Prenatal Care for Women in Rural and Peri-Urban Areas of Georgia | 2016 | Georgia specific | To identify access barriers experienced by women who live in rural and peri-urban areas of Georgai                                                                                                                                                                         | Qualitative research  | N/A                                                                                                                                                                          | Recent mothers                                                                                                                                 |
| 8 | Grant J H., Handwerk K., Baker k., et al. <sup>68</sup>          | Implementing Group Prenatal Care in Southwest Georgia Through Public-Private Partnerships                                | 2018 | Georgia specific | The paper describes the successful implementation of CenteringPregnancy in a public health setting with no prior prenatal services; assesses the program's first 5-year perinatal outcomes (October 2009 through October 2014); and discusses several key lessons learned. | Cross sectional study | The funding was supported by March of Dimes Foundation, Healthcare Georgia Foundation, Centers for Medicare and Medicaid Services and Betty and Davis Fitzgerald Foundation. | low-income women initiating prenatal care and patients with singleton live births who attended at least three Centering Pregnancy sessions (or |

Table I

|    |                                                               |                                                                                                                                  |      |                  |                                                                                                                                                                                                                                   |                                                      |                                                                                                 |                                                                                                                   |
|----|---------------------------------------------------------------|----------------------------------------------------------------------------------------------------------------------------------|------|------------------|-----------------------------------------------------------------------------------------------------------------------------------------------------------------------------------------------------------------------------------|------------------------------------------------------|-------------------------------------------------------------------------------------------------|-------------------------------------------------------------------------------------------------------------------|
|    |                                                               |                                                                                                                                  |      |                  |                                                                                                                                                                                                                                   |                                                      |                                                                                                 | delivered prior to attending the third session).                                                                  |
| 9  | Gavin N I.,<br>Benedict M B.,<br>Adams E K. <sup>69</sup>     | Health service use and outcomes among disabled Medicaid pregnant women                                                           | 2006 | Georgia specific | To investigate differences in health service use and pregnancy outcomes among women enrolled in Medicaid under eligibility categories for the blind and disabled and those enrolled under other eligibility categories.<br>women? | Cohort study                                         | Funded through contract number 500-96-0018 with the Centers for Medicare and Medicaid Services. | Medicaid-covered pregnant women                                                                                   |
| 10 | Daymude A E C.,<br>Daymude J J.,<br>Rochat., R. <sup>70</sup> | Labor and Delivery Unit Closures in Rural Georgia from 2012 to 2016 and the Impact on Black Women: A Mixed-Methods Investigation | 2022 | Georgia specific | To explore what factors may be associated with rural hospital Labour Delivery Unit (LDU) closures in Georgia from 2012 to 2016.                                                                                                   | Other:<br>Mixed<br>Methods<br>Investigation/analysis | Georgia Maternal and Infant Health Research Group (GMIHRG) and the Georgia OBGYN Society.       | Quantitative - analysis of 2011 regional, hospital, and patient data based on LDU closure status in rural Georgia |
| 11 | Bruce F C; Berg C J.; Joski P J., et al. <sup>71</sup>        | Extent of maternal morbidity in a managed care population in Georgia                                                             | 2012 | Georgia specific | To identify pregnancies and associated complications in a defined and more diverse population of women enrolled in a health maintenance organisation in the south-eastern US.                                                     | Cross sectional study                                | Not reported                                                                                    | females aged 11-54 years who were insured by KPGA from the beginning of pregnancy through 8                       |

Table I

|    |                                                                 |                                                                                                                                                     |      |                  |                                                                                                                                                                                                                      |                      |                                                                                                                             | weeks after delivery                                               |
|----|-----------------------------------------------------------------|-----------------------------------------------------------------------------------------------------------------------------------------------------|------|------------------|----------------------------------------------------------------------------------------------------------------------------------------------------------------------------------------------------------------------|----------------------|-----------------------------------------------------------------------------------------------------------------------------|--------------------------------------------------------------------|
| 12 | Barkin J. L., Bloch J.R., Smith K.E. R., et al. <sup>72</sup>   | Knowledge of and Attitudes Toward Perinatal Home Visiting in Women with High-Risk Pregnancies                                                       | 2021 | Georgia specific | The aim of this study was to explore receptiveness toward (and knowledge of) home visiting ser-vices in medically underserved women with high-risk obstetric conditions at a major medical center in central Georgia | Qualitative research | Not reported                                                                                                                | pregnant women (attending high risk obstetric clinic)              |
| 13 | Armstrong-Mensah, E., Dada, D., Bowers, A., et al. <sup>4</sup> | Geographic, Health Care Access, Racial Discrimination, and Socioeconomic Determinants of Maternal Mortality in Georgia, United States               | 2021 | Georgia specific | To identify key social determinants associated with high maternal mortality in Georgia                                                                                                                               | Systematic review    | None                                                                                                                        | Georgia mothers                                                    |
| 14 | Zertuche, A., Spelke, B., Julian, Z., et al. <sup>73</sup>      | Georgia Maternal and Infant Health Research Group (GMIHRG): Mobilizing Allied Health Students and Community Partners to Put Data into Action        | 2016 | Georgia specific | To describe the implementation of a research group aiming to mobilize allied health students and community partners to translate data to action and address the Georgia maternal and child health crisis             | Other: Commentary    | N/A                                                                                                                         | Georgia mothers                                                    |
| 15 | Kramer, M., Waller, L., Dunlop, A., et al. <sup>74</sup>        | Housing transitions and low birth weight among low-income women: longitudinal study of the perinatal consequences of changing public housing policy | 2012 | Georgia specific | To assess the longitudinal association between housing transitions and pregnancy outcomes in a sample of public housing residents                                                                                    | Cohort study         | Maternal and Child Health Bureau, Health Resources and Services Administration, and Department of Health and Human Services | Women residing in Atlanta public housing who had 1 birth on record |
| 16 | Jincharadze N., Kazakhashvili                                   | PROBLEMS OF IMPROVING ANTENATAL MONITORING OF                                                                                                       | 2018 | Georgia specific | To study the trends of mothers' health condition according to the                                                                                                                                                    | Qualitative research |                                                                                                                             |                                                                    |

Table I

|    |                                                           |                                                                                                                         |      |                                                      |                                                                                                                                                                                                                                |                                                                                                       |                                                                                                                                                  |                                                                 |
|----|-----------------------------------------------------------|-------------------------------------------------------------------------------------------------------------------------|------|------------------------------------------------------|--------------------------------------------------------------------------------------------------------------------------------------------------------------------------------------------------------------------------------|-------------------------------------------------------------------------------------------------------|--------------------------------------------------------------------------------------------------------------------------------------------------|-----------------------------------------------------------------|
|    | N., Sakvarelidze I. <sup>75</sup>                         | PREGNANT WOMEN IN THE PRIMARY HEALTH CARE SYSTEM IN GEORGIA                                                             |      |                                                      | implementation of antenatal monitoring of primary healthcare programs in 1996 - 2016 in Georgia.                                                                                                                               |                                                                                                       |                                                                                                                                                  |                                                                 |
| 17 | Jamieson, D., Haddad, L. <sup>76</sup>                    | What Obstetrician/Gynecologists Should Know About Population Health                                                     | 2018 | Georgia specific                                     | To describe successes and challenges of addressing reproductive health issues in Georgia                                                                                                                                       | Narrative text and opinion                                                                            | N/A                                                                                                                                              | Women of reproduction age in Georgia                            |
| 18 | Alzate M. <sup>77</sup>                                   | Welfare recipients' quality of life: lessons from the United Nations' Human Development Index for the US Welfare Policy | 2006 | Georgia specific                                     | Measuring the quality of life (QOL) of single mothers in the state of Georgia, US who were recipients of the Temporary Assistance to Needy Families (TANF) welfare program during 2000 using the Human Development Index (HDI) | Cohort study                                                                                          | Not stated                                                                                                                                       | Single mothers in Georgia USA + Georgian USA general population |
| 19 | Lanier, P., Kennedy, S., Snyder, A., et al. <sup>78</sup> | Prenatal Syphilis Screening Among Medicaid Enrollees in 6 Southern States                                               | 2022 | Other: 6 Southern US States, including Georgia       | To measure syphilis screening among Medicaid enrollees with delivery in southern US states                                                                                                                                     | Cohort study                                                                                          | CDC                                                                                                                                              | Medicaid enrollees in southern states                           |
| 20 | Crowther, S., MacIver, E., Lau, A. <sup>79</sup>          | Policy, evidence and practice for post-birth care plans: a scoping review                                               | 2019 | Other: Conducted in Scotland but wide scoping review | To ascertain: What is known from the existing literature about women's and midwives' experiences, views and perspectives of post-birth care plans                                                                              | Other: Scoping review of empirical literature, government and professional documents from 2005 - 2019 | Funded by a grant from the NHS Grampian Endowment as pump priming funding to enhance services and further research into post birth care to women | Mothers, midwives                                               |

Table 1

|    |                                                                  |                                                                                                                                                    |      |                                                                   |                                                                                                                        |                                  |                                                                                                                                                                |                                                                       |
|----|------------------------------------------------------------------|----------------------------------------------------------------------------------------------------------------------------------------------------|------|-------------------------------------------------------------------|------------------------------------------------------------------------------------------------------------------------|----------------------------------|----------------------------------------------------------------------------------------------------------------------------------------------------------------|-----------------------------------------------------------------------|
| 21 | Till SR, Everetts D, Haas DM <sup>80</sup>                       | Incentives for increasing prenatal care use by women in order to improve maternal and neonatal outcomes                                            | 2015 | Other:<br>Globally                                                | To determine whether incentives are an effective tool to increase utilization of timely prenatal care among women.     | Systematic review                | N/A                                                                                                                                                            | Pregnant women                                                        |
| 22 | Harron, K., Verfuerden, M., Ibiebele, I., et al. <sup>81</sup>   | Preterm birth, unplanned hospital contact, and mortality in infants born to teenage mothers in five countries: An administrative data cohort study | 2020 | Other:<br>Scotland, England, New South Wales, Ontario, and Sweden | To determine whether increased risk of adverse infant outcomes among teenage mothers varies by country                 | Cross sectional study            | Wellcome Trust, NIHR, Health Data Research UK, UK Medical Research Council, Canadian Institutes of Health Research, Institute for Clinical Evaluative Sciences | Teenage mothers                                                       |
| 23 | McInnes, R., Aitken-Arbuckle, A., Lake, S., et al. <sup>82</sup> | Implementing continuity of midwife carer - just a friendly face? A realist evaluation                                                              | 2020 | Scotland specific                                                 | To evaluate the implementation of continuity of midwife carer model in the Scottish maternity plan                     | Qualitative research             | NMAHP Clinical Academic Research Career Program                                                                                                                | Maternity patients within one Scottish health board                   |
| 24 | Young, D., Shield N., Holmes A., et al. <sup>83</sup>            | A new style of midwife-managed antenatal care: costs and satisfaction                                                                              | 1997 | Scotland specific                                                 | To assess the effect on women and their families receiving a new style of midwife-managed care in the antenatal period | Randomised controlled trial      | A grant from the Scottish Home and Health Department                                                                                                           | Pregnant women receiving care at the Glasgow Royal Maternity Hospital |
| 25 | Pitchforth E., Watson V., Tucker J., et al <sup>84</sup>         | Models of intrapartum care and women's trade-offs in remote and rural Scotland: a mixed-methods study                                              | 2007 | Scotland specific                                                 | To explore women's preferences for, and trade-offs between, key attributes of intrapartum care models                  | Other:<br>Mixed methods research | Remote and Rural Areas Resource Initiative (RARARI), NHS Scotland                                                                                              | Pregnant women in rural Northern Scotland                             |

Table 1

|    |                                                                   |                                                                                                                                         |      |                   |                                                                                                                                                                    |                           |                                                                                                                         |                                                                                                                                     |
|----|-------------------------------------------------------------------|-----------------------------------------------------------------------------------------------------------------------------------------|------|-------------------|--------------------------------------------------------------------------------------------------------------------------------------------------------------------|---------------------------|-------------------------------------------------------------------------------------------------------------------------|-------------------------------------------------------------------------------------------------------------------------------------|
| 26 | Pitchforth E., van Teijlingen E., Watson V., et al. <sup>85</sup> | Choice and place of delivery: a qualitative study of women in remote and rural Scotland                                                 | 2009 | Scotland specific | To explore women's perceptions and experiences of "choice" of place of delivery in remote and rural areas in the North of Scotland region.                         | Qualitative research      | The research was funded by NHS Scotland RARARI                                                                          | Women who had recent experience of maternity services                                                                               |
| 27 | McInnes, R., Hollins Martin, C., and MacArthur, J. <sup>86</sup>  | Midwifery continuity of carer: Developing a realist evaluation framework to evaluate the implementation of strategic change in Scotland | 2018 | Scotland specific | To develop a tool to evaluate the implementation of the 'Best Start' midwifery continuity of carer model                                                           | Other: Realist evaluation | Clinical Academic Research Careers Grant                                                                                | Midwives and pregnant women                                                                                                         |
| 28 | McGuire, M., Dagge-Bell, F., Purton, P., et al. <sup>87</sup>     | Shaping maternity services in Scotland                                                                                                  | 2004 | Scotland specific | To describe maternity services in Scotland                                                                                                                         | Other: Audit              | N/A                                                                                                                     |                                                                                                                                     |
| 29 | MacLachlan A., Crawford K., Shinwell S. <sup>88</sup>             | Recruiting hard-to-reach pregnant women at high psychosocial risk: strategies and costs from a randomised controlled trial              | 2021 | Scotland specific | To report recruitment strategies for hard-to-reach pregnant women in an RCT called The Trial for Healthy Relationship Initiatives in the Very Early years (THRIVE) | Qualitative research      | National Institute for Health Research Public Health Research Programme; Chief Scientist Office and Scottish Government | Pregnant women receiving maternity care within the NHS Greater Glasgow and Clyde and NHS Ayrshire & Arran health boards in Scotland |
| 30 | Hundley, V., Rennie, A., Fitzmaurice, A., et al. <sup>89</sup>    | A national survey of women's views of their maternity care in Scotland                                                                  | 2000 | Scotland specific | To determine the extent to which recommendations of recent national policy have taken effect                                                                       | Cross sectional study     | The study was commissioned by the Scottish Programme for                                                                | Women giving birth in Scotland                                                                                                      |



Table I

|    |                                                                |                                                                                                                |      |                   |                                                                                                                                                                                                                                            |                               |                                                                                                                                                                            |                                                                                                              |
|----|----------------------------------------------------------------|----------------------------------------------------------------------------------------------------------------|------|-------------------|--------------------------------------------------------------------------------------------------------------------------------------------------------------------------------------------------------------------------------------------|-------------------------------|----------------------------------------------------------------------------------------------------------------------------------------------------------------------------|--------------------------------------------------------------------------------------------------------------|
|    |                                                                |                                                                                                                |      |                   |                                                                                                                                                                                                                                            |                               | Clinical Effectiveness in Reproductive Health (SPCERH) which is funded by the Clinical Resource and Audit Group (CRAG) of the Scottish Executive Health Department (SEHD). |                                                                                                              |
| 31 | Hundley, V., Penney, G., Fitzmaurice, A., et al. <sup>90</sup> | A comparison of data obtained from service providers and service users to assess the quality of maternity care | 2001 | Scotland specific | To compare maternity service data between service providers and service users in Scotland                                                                                                                                                  | Other: Mixed methods research | Women giving birth and care professionals                                                                                                                                  |                                                                                                              |
| 32 | Frank J., Bromley C., Doi L., et al. <sup>91</sup>             | Seven key investments for health equity across the life course: Scotland versus the rest of the UK             | 2015 | Scotland specific | The paper summarises the evidence, from both published studies and routinely collected data in the UK on socioeconomic and health outcomes, that illuminates how well Scotland in particular is doing, in comparison to the rest of the UK | Narrative text and opinion    | Funded by the SCPHRP core grant from the Medical Research Council (Grant Number MR/K023209/1) and the Chief Scientist Office of Scotland.                                  | Scottish population throughout the life course including youth; family planning; prenatal and perinatal care |
| 33 | Cheyne, H., Abhyanker, P., and McCourt, C. <sup>92</sup>       | Empowering change: Realist evaluation of a Scottish Government programme to support normal birth               | 2013 | Scotland specific | To understand the ways the Keeping Childbirth Natural and Dynamic (KCND) did and did not work in different maternity care contexts                                                                                                         | Other: Mixed methods research | Scottish Government Chief Nurse's Office                                                                                                                                   | Midwives and pregnant women                                                                                  |

Table I

|    |                                                      |                                                                                                                                                                                                |      |                   |                                                                                                                                                                                                                                                                                                                                                                                                 |                             |                                                                                                                 |                                                                                                                             |
|----|------------------------------------------------------|------------------------------------------------------------------------------------------------------------------------------------------------------------------------------------------------|------|-------------------|-------------------------------------------------------------------------------------------------------------------------------------------------------------------------------------------------------------------------------------------------------------------------------------------------------------------------------------------------------------------------------------------------|-----------------------------|-----------------------------------------------------------------------------------------------------------------|-----------------------------------------------------------------------------------------------------------------------------|
| 34 | Barnett, C. <sup>93</sup>                            | WHO Health Promoting Hospitals: maternity services in Scotland                                                                                                                                 | 2007 | Scotland specific | AIM: To audit the maternity service in Tayside, against the World Health Organisation's five standards for health promoting hospitals. However, the paper reports that "results of this audit were currently being analysed". The paper itself focuses on discussion of "the experience of using this audit tool and the advantages of participating in the Health Promoting Hospital networks" | Narrative text and opinion  | Not reported                                                                                                    | senior managers within the NHS board maternity service, midwifery staff within the NHS board, pregnant and postpartum women |
| 35 |                                                      | Significant drop in Scotland's premature birth rate <sup>94</sup>                                                                                                                              | 2012 | Scotland specific | research analysis by Glasgow University mentioned, no other details                                                                                                                                                                                                                                                                                                                             | Other: news piece           | NA                                                                                                              | expectant mothers who smoke                                                                                                 |
| 36 | Puthussery S. <sup>95</sup>                          | Perinatal outcomes against migrant mothers in the United Kingdom: Is it a matter of biology, behaviour, policy, social determinants or access to health care?                                  | 2016 | UK                | To examine trends in perinatal outcomes among migrant mothers in the UK and explore potential contributors to disparities                                                                                                                                                                                                                                                                       | Qualitative research        | N/A                                                                                                             | Migrant mothers in the UK                                                                                                   |
| 37 | Turienzo C., Bick D., Briley A. et al. <sup>96</sup> | Midwifery continuity of care versus standard maternity care for women at increased risk of preterm birth: A hybrid implementation - effectiveness, randomised controlled pilot trial in the UK | 2020 | UK                | To assess feasibility, fidelity, and clinical outcomes of a model of midwifery continuity of care linked with a specialist obstetric clinic for women considered at increased risk for PTB                                                                                                                                                                                                      | Randomised controlled trial | the National Institute for Health Research Collaboration for Leadership in Applied Health Research South London | Pregnant women at increased risk of preterm birth (PTB)                                                                     |

Table I

|    |                                                                                                                                                           |                                                                                                                                   |      |                  |                                                                                  |                                                  |                                                     |                                                                                                                                                                                                  |
|----|-----------------------------------------------------------------------------------------------------------------------------------------------------------|-----------------------------------------------------------------------------------------------------------------------------------|------|------------------|----------------------------------------------------------------------------------|--------------------------------------------------|-----------------------------------------------------|--------------------------------------------------------------------------------------------------------------------------------------------------------------------------------------------------|
| 38 | Gale N.K.,<br>Kenyon S.,<br>MacArthur C., et<br>al <sup>97</sup>                                                                                          | Synthetic social support:<br>Theorizing lay health worker<br>interventions                                                        | 2018 | UK               |                                                                                  | Qualitative<br>research                          | National Institute<br>for Health<br>Research (NIHR) |                                                                                                                                                                                                  |
| 39 | Courtemanche,<br>C., Marton, J.,<br>Ukert, B., et al. <sup>98</sup>                                                                                       | Early Impacts of the<br>Affordable Care Act on Health<br>Insurance Coverage in<br>Medicaid Expansion and Non-<br>Expansion States | 2017 | United<br>States | To identify the effects of<br>Medicaid in expansion and non-<br>expansion states | Cross<br>sectional<br>study                      | Medicaid<br>participants                            |                                                                                                                                                                                                  |
| 40 | American<br>Health and Care<br>organisations -<br>led by American<br>College of<br>Obstetricians<br>and<br>Gynaecologists<br>(listed first) <sup>99</sup> | Joint Letter to Congressional<br>Leaders Supporting Maternal<br>Health                                                            | 2021 | United<br>States | NA                                                                               | Other:<br>Letter to<br>Congress                  | NA                                                  | Mothers                                                                                                                                                                                          |
| 41 | Abraham G.<br>(President of<br>American<br>college of<br>Physicians)                                                                                      | Joint Letter to Congressional<br>Leaders                                                                                          | 2021 | United<br>States | NA                                                                               | Other:<br>Letter to<br>Congressio<br>nal Leaders | NA                                                  | Americans<br>who live<br>and/or work<br>in<br>underserved<br>communities<br>disproportio<br>nately<br>disadvantage<br>d by societal<br>and<br>economic<br>problems,<br>communities<br>of colour, |

Table I

|    |                                                                 |                                                                                                                                            |      |                  |                                                                                                                                                                                                                                         |                                  |                                                                               |                                                                                                                        |
|----|-----------------------------------------------------------------|--------------------------------------------------------------------------------------------------------------------------------------------|------|------------------|-----------------------------------------------------------------------------------------------------------------------------------------------------------------------------------------------------------------------------------------|----------------------------------|-------------------------------------------------------------------------------|------------------------------------------------------------------------------------------------------------------------|
|    |                                                                 |                                                                                                                                            |      |                  |                                                                                                                                                                                                                                         |                                  |                                                                               | elders,<br>mothers and<br>babies                                                                                       |
| 42 | Sutton M Y.,<br>Anachebe N F.,<br>Lee R., et al. <sup>100</sup> | Racial and Ethnic Disparities in<br>Reproductive Health Services<br>and Outcomes, 2020                                                     | 2021 | United<br>States | The purpose of this commentary<br>is to<br>update regarding reproductive<br>health disparities in the United<br>States and inform national<br>health-equity efforts.                                                                    | Narrative<br>text and<br>opinion | None stated                                                                   | Women of<br>reproductive<br>age                                                                                        |
| 43 | Ranjit A., Jiang<br>W., Zhan T. et<br>al. <sup>101</sup>        | Intrapartum obstetric care in<br>the United States military:<br>Comparison of military and<br>civilian care systems within<br>TRICARE      | 2017 | United<br>States | To compare frequency of<br>intrapartum obstetric procedures<br>and out-comes such as severe<br>acute maternal morbidity<br>(SAMM) and common<br>postpartum complications<br>between direct and purchased<br>care systems within TRICARE | Qualitative<br>research          | Henry M. Jackson<br>Foundation for the<br>Advancement of<br>Military Medicine | Expectant<br>mothers who<br>are<br>beneficiaries<br>of TRICARE                                                         |
| 44 | Palmer L, Cook<br>A., Courtot B. <sup>102</sup>                 | Comparing Models of<br>Maternity Care Serving<br>Women at Risk of Poor Birth<br>Outcomes in Washington, DC                                 | 2010 | United<br>States | To describe the organization,<br>delivery, and content of care of<br>three models of maternity care<br>and to analyze how the models<br>of care might be improved to<br>better serve this population                                    | Qualitative<br>research          | N/A                                                                           | low income<br>African-<br>American<br>women in<br>Washington,<br>DC                                                    |
| 45 | Mazul, M.,<br>Ward, T., Ngui,<br>E., et al.                     | Anatomy of Good Prenatal<br>Care: Perspectives of Low<br>Income African-American<br>Women on Barriers and<br>Facilitators to Prenatal Care | 2016 | United<br>States | To examine the perspectives of<br>low-income African-American<br>women on barriers and<br>facilitators to receiving prenatal<br>care in an urban setting                                                                                | Qualitative<br>research          | Children's<br>Community Health<br>Plan                                        | 29 African<br>American<br>women<br>recruited<br>from the<br>YWCA of<br>Southeast<br>Wisconsin, a<br>community<br>based |

Table I

|    |                                                                 |                                                                                                         |      |               |                                                                                                                                  |              |                                                                                                                                                                                                                                                                                                                                                                       |                                                        |
|----|-----------------------------------------------------------------|---------------------------------------------------------------------------------------------------------|------|---------------|----------------------------------------------------------------------------------------------------------------------------------|--------------|-----------------------------------------------------------------------------------------------------------------------------------------------------------------------------------------------------------------------------------------------------------------------------------------------------------------------------------------------------------------------|--------------------------------------------------------|
|    |                                                                 |                                                                                                         |      |               |                                                                                                                                  |              |                                                                                                                                                                                                                                                                                                                                                                       | organization that serves low and moderate-income women |
| 46 | Gavin N. I., Adams E. K., Hartmann K. E., et al. <sup>103</sup> | Racial and ethnic disparities in the use of pregnancy-related health care among Medicaid pregnant women | 2004 | United States | To assess the extent to which racial and ethnic disparities exist in the use of prenatal services among Medicaid pregnant women. | Cohort study | Funded through contract number 500-96-0018 with the Centers for Medicare and Medicaid Services. The Texas claims and birth certificate data were provided by the Texas Department of Health and the Health Resources and Services Administration. The Georgia birth certificate data and linkage to the SMRF claims were provided by the Georgia Department of Health | Pregnant women covered by Medicaid                     |

Table I

|    |                                                                            |                                                                                                                                                                                 |      |                  |                                                                                                                                                                                                                      |                             |                                                                                                                                                                                                                                                                         |                                                         |
|----|----------------------------------------------------------------------------|---------------------------------------------------------------------------------------------------------------------------------------------------------------------------------|------|------------------|----------------------------------------------------------------------------------------------------------------------------------------------------------------------------------------------------------------------|-----------------------------|-------------------------------------------------------------------------------------------------------------------------------------------------------------------------------------------------------------------------------------------------------------------------|---------------------------------------------------------|
| 47 | Stanhope K.,<br>Suglia S., Hogue<br>C. et al. <sup>104</sup>               | Spatial Variation in Very<br>Preterm Birth to Hispanic<br>Women Across the United<br>States: The Role of Intensified<br>Immigration Enforcement                                 | 2021 | United<br>States | To estimate the effect of<br>adoption of a 287(g) immigration<br>enforcement agreement on<br>county-level very preterm birth<br>(VPTB) rates among US-born and<br>foreign-born Hispanic women                        | Cohort<br>study             | N/A                                                                                                                                                                                                                                                                     | US-born and<br>foreign-born<br>Hispanic<br>mothers      |
| 48 | Stanhope K K.,<br>Hogue C R.,<br>Suglia S F., et<br>al. <sup>105</sup>     | Restrictive sub-federal<br>immigration policy climates<br>and very preterm birth risk<br>among US-born and foreign-<br>born Hispanic mothers in the<br>United States, 2005-2016 | 2019 | United<br>States | To examine how living in a state<br>at the time of delivery with a<br>more restrictive immigration<br>policy climate impacts risk of very<br>preterm birth (VPTB) among<br>Hispanic mothers in the United<br>States. | Cross<br>sectional<br>study | This project was<br>supported by the<br>Health Resources<br>and Services<br>Administration<br>(HRSA) of the U.S.<br>Department of<br>Health and Human<br>Services (HHS)<br>under grant<br>number<br>T03MC07651 as<br>part of the first<br>authors<br>dissertation work. | Hispanic<br>mothers                                     |
| 49 | Merkt, P.,<br>Kramer, M.,<br>Goodman, D., et<br>al. <sup>106</sup>         | Urban-rural differences in<br>pregnancy-related deaths,<br>United States, 2011-2016                                                                                             | 2021 | United<br>States | To compare pregnancy-related<br>mortality across and within urban<br>and rural counties in the United<br>States                                                                                                      | Cross<br>sectional<br>study | N/A                                                                                                                                                                                                                                                                     | Pregnancy                                               |
| 50 | Li, J., Pesko, M.,<br>Unruh, M., et<br>al. <sup>107</sup>                  | Effect of the Medicaid Primary<br>Care Rate Increase on Prenatal<br>Care Utilization Among<br>Medicaid-Insured Women                                                            | 2019 | United<br>States | To evaluate the increase in<br>Medicaid primary care<br>reimbursement fee on prenatal<br>care utilization                                                                                                            | Cohort<br>study             | Agency for<br>Healthcare<br>Research and<br>Quality                                                                                                                                                                                                                     | Mothers<br>insured by<br>Medicaid                       |
| 51 | Kroelinger C D.,<br>Okoroh E M.,<br>Goodman D A.,<br>et al. <sup>108</sup> | Comparison of state risk-<br>appropriate neonatal care<br>policies with the 2012 AAP<br>policy statement                                                                        | 2018 | United<br>States | To compare USA state policies<br>with standards outlined in the<br>2012 American Academy of                                                                                                                          | Systematic<br>review        | Not stated                                                                                                                                                                                                                                                              | US state-<br>wide hospital<br>neonatal<br>care policies |

Table I

|    |                                                                           |                                                                                     |      |               |                                                                                                                                                                                                            |                            |                    |                                                                                                                                                                                                     |
|----|---------------------------------------------------------------------------|-------------------------------------------------------------------------------------|------|---------------|------------------------------------------------------------------------------------------------------------------------------------------------------------------------------------------------------------|----------------------------|--------------------|-----------------------------------------------------------------------------------------------------------------------------------------------------------------------------------------------------|
|    |                                                                           |                                                                                     |      |               | Paediatrics Policy Statement on Levels of Neonatal Care.                                                                                                                                                   |                            |                    |                                                                                                                                                                                                     |
| 52 | Khan, A.,<br>DeYoung S E. <sup>109</sup>                                  | Maternal health services for refugee populations:<br>Exploration of best practices  | 2019 | United States | To examine the maternal care services provided to refugee women in camps and after resettlement to the United States, and to analyse organisational successes and challenges in service provision.         | Qualitative research       | No funding sources | Adults 18 years or older who worked in or managed non-profit organisations that provided maternal healthcare services to refugee women, including prenatal, postnatal and family planning services. |
| 53 | Jackson F.,<br>Rashied-Henry K.,<br>Braveman P.,<br>et al. <sup>110</sup> | A Prematurity Collaborative Birth Equity Consensus Statement for Mothers and Babies | 2020 | United States | A statement that highlights risks and protections of social determinants based on the prevailing science, and identifies promising solutions for reducing preterm birth and eliminating racial disparities | Narrative text and opinion | N/A                | African-American/Na tive American pregnant women                                                                                                                                                    |
| 54 | Grigorescu V.,<br>D'Angelo D.,<br>Harrison L. <sup>111</sup>              | Implementation Science and the Pregnancy Risk Assessment Monitoring System          | 2014 | United States | To describe the restructuring of the Pregnancy Risk Assessment Monitoring System (PRAMS), a surveillance system of the                                                                                     | Qualitative research       | N/A                | Pregnant women                                                                                                                                                                                      |

Table I

|    |                                                                     |                                                                                                                                        |      |               |                                                                                                                                           |                         |                                            |                                                                                          |
|----|---------------------------------------------------------------------|----------------------------------------------------------------------------------------------------------------------------------------|------|---------------|-------------------------------------------------------------------------------------------------------------------------------------------|-------------------------|--------------------------------------------|------------------------------------------------------------------------------------------|
|    |                                                                     |                                                                                                                                        |      |               | Centers for Disease Control and Prevention (CDC)'s Division of Reproductive Health                                                        |                         |                                            |                                                                                          |
| 55 | Callaghan, W. <sup>112</sup>                                        | Geographic variation of reproductive health indicators and outcomes in the United States: place matters                                | 2014 | United States | To illustrate variation in reproductive health across various regions and states in the United States and within these regions and states | Observational study     | N/A                                        | US adults of reproductive age                                                            |
| 56 | Bullinger, L., Simon, K., and Tucker Edmonds, B. <sup>113</sup>     | Coverage Effects of the ACA's Medicaid Expansion on Adult Reproductive-Aged Women, Postpartum Mothers, and Mothers with Older Children | 2022 | United States | To estimate the effect of Medicaid expansion on various groups of women                                                                   | Cross sectional study   | N/A                                        | Low income adult women                                                                   |
| 57 | Broussard D.L., Sappenfield W.B., Fussman C., et al. <sup>114</sup> | Core State Preconception Health Indicators: A Voluntary, Multi-state Selection Process                                                 | 2011 | United States | Monitor the health of reproductive age women (aged 18-44 years).                                                                          | Other: Evaluation study | Centers for Disease Control and Prevention | Health of reproductive age women aged 18-44 years                                        |
| 58 | Boulet, S., Johnson, K., Parker, C., et al. <sup>115</sup>          | A perspective of preconception health activities in the United States                                                                  | 2006 | United States | To identify existing programs and innovative strategies for preconception health promotion                                                | Systematic review       | U.S. Department of Energy and CDC          |                                                                                          |
| 59 | Barreto, T., Li, C., Yoon-Kyung, C., et al. <sup>115</sup>          | Measuring State-Level Racial Inequity in Severe Maternal Morbidity in the Medicaid Population                                          | 2021 | United States | To identify states with racial equity in maternal morbidity                                                                               | Cohort study            | N/A                                        | Inpatient and outpatient Medicaid claims from 28 states (including GA) and Washington DC |



Table I

|    |                                                  |                                                                                 |      |                  |    |                                  |    |                                 |
|----|--------------------------------------------------|---------------------------------------------------------------------------------|------|------------------|----|----------------------------------|----|---------------------------------|
| 60 | Adams E. K.,<br>Johnston E.<br>M. <sup>116</sup> | Insuring Women in the United<br>States Before, During, and<br>After Pregnancies | 2016 | United<br>States | NA | Narrative<br>text and<br>opinion | NA | women of<br>reproductive<br>age |
|----|--------------------------------------------------|---------------------------------------------------------------------------------|------|------------------|----|----------------------------------|----|---------------------------------|



Studies from databases/registers (n = 1099)

References from grey literature (n = 253)

References removed (n = 158)

Duplicates identified manually (n = 1)  
Duplicates identified by Covidence (n = 157)

Studies screened (n = 941)

Studies excluded (n = 820)

Studies sought for retrieval (n = 121)

Studies not retrieved (n = 0)

Studies assessed for eligibility (n = 121)

Studies excluded (n = 61)

No full text (n = 12)  
Wrong country (n = 3)  
Abortion related (n = 1)  
No empirical data (n = 6)  
Not within time frame (n = 7)  
Maternal mortality focus (n = 3)  
37 weeks or over gestation (n = 2)  
Wrong patient population e.g.  
paediatric/postpartum (n = 20)  
Not related to policy/concept that impacts on  
maternal health (n = 7)

Studies included in review (n = 60)

# POLICY / FRAMEWORK

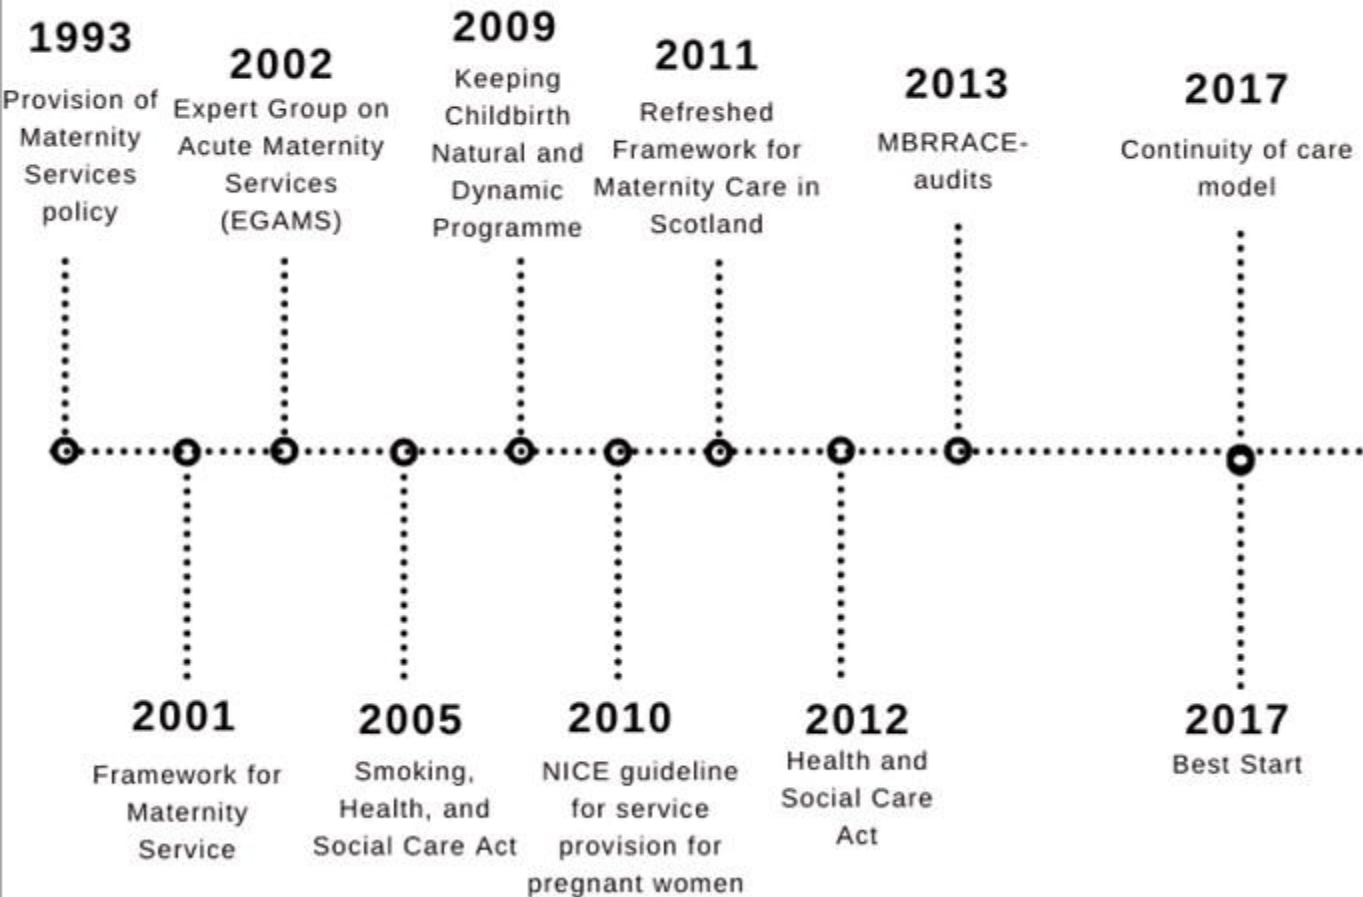

# POLICY / PROGRAMME

**1993**

Enterprise  
Community  
Healthy  
Start  
project

**2009**

Centering  
Pregnancy  
program

**2010**

Georgia  
Maternal &  
Infant Health  
Research  
Group founded

**2013-2014**

Medicaid  
expansion  
following ACA  
(Obamacare)

**2021**

Black Maternal  
Health Omnibus

**2005**

Georgia  
Telehealth Law

**2010**

The Patient  
Protection and  
Affordable Care  
Act

**2018**

Preventing  
Maternal Deaths  
Act

**2020**

Georgia signs  
287(g)  
immigration  
enforcement  
agreement

**2021**

Build Back  
Better Act

# LEGISLATION
